# Supplementary material for: Convalescent plasma to treat COVID-19: clinical experience and efficacy
Source: Aging (Albany NY). 2021 Mar 18;13(6):7758–66. doi: 10.18632/aging.202795 (PMC8034927; doi:10.18632/aging.202795)
Supplement: Supplementary Tables [file aging-13-202795-s001.pdf]

## SUPPLEMENTARY TABLES

**Supplementary Table 1. Detection of novel coronavirus antibody: Colloidal gold label technology and ELISA.**

| Sample No.    | Colloidal gold label technology |      | ELISA |       |
|---------------|---------------------------------|------|-------|-------|
|               | IgG                             | IgM  | IgG   | IgM   |
| 1             | +                               | -    | 640   | 1280  |
| 2             | +                               | -    | 80    | 640   |
| 3             | +                               | -    | 210   | 1280  |
| 4             | ±                               | -    | 80    | 320   |
| 5             | +                               | -    | 160   | 2560  |
| 6             | +                               | -    | 160   | 2560  |
| 7             | ±                               | -    | 80    | -     |
| 8             | +                               | -    | 80    | 2560  |
| 9             | -                               | -    | 40    | 320   |
| 10            | +                               | -    | 320   | -     |
| 11            | +                               | -    | 80    | -     |
| 12            | ±                               | -    | 40    | -     |
| 13            | +                               | -    | 160   | 650   |
| 14            | +                               | -    | 160   | 2560  |
| 15            | +                               | -    | 160   | 1280  |
| 16            | ±                               | -    | 40    | -     |
| 17            | +                               | ±    | 640   | 2560  |
| Positive rate | 94.1%                           | 5.9% | 100%  | 70.6% |

Coincidence Rate: IgG 94.12%.  
IgM 29.41%.

Dilution Ratio: Colloidal gold 1:8.  
ELISA 1:10.

**Supplementary Table 2. Characteristics of the patients of exposure group and control group.**

| Characteristics                                         | Exposure group   | Control group    |                  | P      |
|---------------------------------------------------------|------------------|------------------|------------------|--------|
|                                                         | Hunan (N=19)     | Hunan (N=23)     | Hubei (N=20)     |        |
| Age (age), mean±SD                                      | 66.3±15.3        | 57.3±15.0        | 69.1±14.3        | 0.030  |
| Sex, n (%)                                              |                  |                  |                  |        |
| Male                                                    | 11 (57.9)        | 13 (56.5)        | 12 (60.0)        | 0.964  |
| Female                                                  | 8 (42.1)         | 10 (35.1)        | 8 (40.0)         |        |
| Severity, n (%)                                         |                  |                  |                  |        |
| Mild-to-moderate                                        | 0 (0.0)          | 0 (0.0)          | 0 (0.0)          | 0.053  |
| Severe                                                  | 6 (31.6)         | 1 (4.3)          | 6 (30.0)         |        |
| Critical                                                | 13 (68.4)        | 22 (95.7)        | 14 (70.0)        |        |
| Admission date                                          |                  |                  |                  |        |
| First case                                              | 22 Jan 2020      | 20 Jan 2020      | 3 Feb 2020       |        |
| Last case                                               | 28 Feb 2020      | 6 Feb 2020       | 24 Feb 2020      |        |
| Time from onset to hospitalization (days), median (IQR) | 4.5 (3.0–7.7)    | 5.0 (3.0–8.0)    | 13.0 (8.5–15.0)  | <0.001 |
| Length of stay (days) among survivors, median (IQR)     | 32.5 (24.5–37.7) | 20.0 (17.0–21.0) | 29.0 (26.0–31.3) | <0.001 |
| Time from hospitalization to death (days), median (IQR) | N/A              | 10.0 (3.3–22.7)  | 22.0 (19.0–22.0) | 0.157  |

**Supplementary Table 3. The demographic characteristics of the donors.**

| Donors no. | Blood center                                                        | Gender | Age | Donated plasma volume, ml | Blood type | IgM/IgG               | Neutralizing antibody titer |
|------------|---------------------------------------------------------------------|--------|-----|---------------------------|------------|-----------------------|-----------------------------|
| D1         | Department of Blood Transfusion Laboratory of Changsha Blood Center | Male   | 40  | 400                       | A          | Negative/<br>Positive | 80                          |
| D3         | Department of Blood Transfusion Laboratory of Changsha Blood Center | Male   | 41  | 400                       | A          | Positive/<br>Positive | 320                         |
| D4         | Department of Blood Transfusion Laboratory of Changsha Blood Center | Male   | 30  | 400                       | B          | Negative/<br>Positive | 1280                        |
| D5         | Department of Blood Transfusion Laboratory of Changsha Blood Center | Male   | 29  | 400                       | A          | Positive/<br>Positive | 640                         |
| D6         | Department of Blood Transfusion Laboratory of Changsha Blood Center | Male   | 38  | 400                       | A          | Positive/<br>Positive | 1280                        |
| D7         | Department of Blood Transfusion Laboratory of Zhuzhou Blood Center  | Male   | 47  | 400                       | A          | Positive/<br>Positive | 320                         |
| D8         | Department of Blood Transfusion Laboratory of Zhuzhou Blood Center  | Male   | 30  | 400                       | A          | Positive/<br>Positive | 640                         |
| D9         | Department of Blood Transfusion Laboratory of Zhuzhou Blood Center  | Female | 26  | 400                       | O          | Positive/<br>Positive | 160                         |
| D10        | Department of Blood Transfusion Laboratory of Zhuzhou Blood Center  | Female | 41  | 400                       | A          | Did not detected      | Did not detected            |
| D11        | Department of Blood Transfusion Laboratory of                       | Female | 44  | 400                       | A          | Negative/<br>Positive | 640                         |

|     |                                                                     |        |    |     |    |                                           |                  |
|-----|---------------------------------------------------------------------|--------|----|-----|----|-------------------------------------------|------------------|
|     | Zhuzhou Blood Center                                                |        |    |     |    |                                           |                  |
| D12 | Department of Blood Transfusion Laboratory of Zhuzhou Blood Center  | Female | 23 | 400 | AB | Negative/<br>Positive                     | 640              |
| D13 | Department of Blood Transfusion Laboratory of Zhuzhou Blood Center  | Male   | 31 | 400 | AB | Positive/<br>Positive                     | 320              |
| D15 | Department of Blood Transfusion Laboratory of Yueyang Blood Center  | Female | 49 | 300 | B  | Positive/<br>Positive                     | 640              |
| D16 | Department of Blood Transfusion Laboratory of Yueyang Blood Center  | Male   | 43 | 400 | O  | Positive/<br>Positive                     | 640              |
| D17 | Department of Blood Transfusion Laboratory of Yueyang Blood Center  | Male   | 22 | 400 | O  | Positive/<br>Positive                     | 640              |
| D20 | Department of Blood Transfusion Laboratory of Loudi Blood Center    | Female | 36 | 400 | O  | Positive/<br>Positive                     | 1280             |
| D21 | Department of Blood Transfusion Laboratory of Loudi Blood Center    | Female | 38 | 400 | A  | Weekly<br>Positive/<br>Positive           | 320              |
| D23 | Department of Blood Transfusion Laboratory of Loudi Blood Center    | Male   | 41 | 400 | O  | Weekly<br>Positive/<br>Weekly<br>Positive | 80               |
| D24 | Department of Blood Transfusion Laboratory of Loudi Blood Center    | Male   | 42 | 400 | A  | Positive/<br>Positive                     | 320              |
| D25 | Department of Blood Transfusion Laboratory of Loudi Blood Center    | Male   | 40 | 400 | B  | Weekly<br>Positive/<br>Positive           | 320              |
| D27 | Department of Blood Transfusion Laboratory of Xiangtan Blood Center | Male   | 47 | 400 | O  | Positive/<br>Positive                     | 640              |
| D30 | Department of Blood Transfusion Laboratory of Shaoyang Blood Center | Male   | 24 | 300 | A  | Did not<br>detected                       | Did not detected |
| D33 | Department of Blood Transfusion Laboratory of Shaoyang Blood Center | Female | 22 | 200 | A  | Negative/<br>Positive                     | 320              |
